# 1 **Knockout of zebrafish desmin genes does not cause skeletal muscle** 2 **degeneration but alters calcium flux.**

3 Gulsum Kayman Kurekci<sup>1</sup>, Ecem Kural Mangit<sup>1,2</sup>, Cansu Koyunlar<sup>1,3</sup>, Seyda Unsal<sup>1</sup>, Berk  
4 Saglam<sup>4</sup>, Bora Ergin<sup>4</sup>, Ismail Uyanik<sup>5</sup>, Niloufar Düz<sup>1</sup>, Beril Talim<sup>6</sup>, Nuhan Purali<sup>4</sup>, Simon M.  
5 Hughes<sup>7</sup>, Pervin R. Dincer<sup>1\*</sup>.

6 <sup>1</sup>Department of Medical Biology, Hacettepe University Faculty of Medicine, Ankara, 06100,  
7 Turkey.

8 <sup>2</sup>Laboratory Animals Research and Application Centre, Hacettepe University, Ankara, 06100,  
9 Turkey

10 <sup>3</sup>Current address: Department of Hematology, Erasmus MC, Rotterdam, 3015 CN, The  
11 Netherlands

12 <sup>4</sup>Department of Biophysics, Hacettepe University Faculty of Medicine, Ankara, 06100, Turkey.

13 <sup>5</sup>Department of Electrical and Electronics Engineering, Hacettepe University Faculty of  
14 Engineering, Ankara, 06800, Turkey.

15 <sup>6</sup>Department of Pediatrics, Pathology Unit, Hacettepe University Faculty of Medicine, Ankara,  
16 06100, Turkey.

17 <sup>7</sup>Randall Centre for Cell and Molecular Biophysics, New Hunt's House, Guy's Campus, King's  
18 College London, London, SE1 1UL, United Kingdom.

19 \*Corresponding author.

## 20 **Abstract**

21 Desmin is a muscle-specific intermediate filament protein that has fundamental role in muscle  
22 structure and force transmission. Whereas human desmin protein is encoded by a single gene, two  
23 desmin paralogs (*desma* and *desmb*) exist in zebrafish. *Desma* and *desmb* show differential  
24 spatiotemporal expression during zebrafish embryonic and larval development, being similarly  
25 expressed in skeletal muscle until hatching, after which expression of *desmb* shifts to gut smooth  
26 muscle. We generated knockout (KO) mutant lines carrying loss-of-function mutations for each  
27 gene by using CRISPR/Cas9. *Desma;desmb* double mutants are viable and fertile, and lack obvious  
28 skeletal muscle, heart or intestinal defects. In contrast to morphants, knockout of each gene did

29 not cause any overt muscular phenotype, but did alter calcium flux in myofibres. These results  
30 point to a possible compensation mechanism in these mutant lines generated by targeting nonsense  
31 mutations to the first coding exon.

## 32 **Introduction**

33 Desmin is a type III intermediate filament protein that is specifically expressed in skeletal, cardiac  
34 and smooth muscles. In addition to their fundamental role in maintaining the structural integrity  
35 of the sarcomere, desmin intermediate filaments are involved in mechanotransduction and  
36 organelle positioning. Desminopathies belonging to myofibrillar myopathies are primarily  
37 characterized by abnormal protein aggregates in muscle and present as progressive skeletal  
38 myopathy and/or cardiomyopathy<sup>1</sup>. Although the involvement of smooth muscles is not widely  
39 reported, some patients suffer from smooth muscle dysfunction such as swallowing difficulties,  
40 intestinal pseudo-obstruction and respiratory insufficiency<sup>2-4</sup>. The majority of desmin mutations  
41 are associated with desmin aggregates; however, some mutations have been reported to not alter  
42 filament assembly and network integrity *in vivo* or *in vitro*<sup>5,6</sup>. KO of desmin in mice does not affect  
43 the viability and the development of muscles; however, muscle degeneration and cardiomyopathy  
44 are observed<sup>7,8</sup>.

45 Zebrafish is a widely used model for neuromuscular disorders<sup>9,10</sup>. Besides the advantage  
46 of being the most abundant tissue in zebrafish; the gene profile, and the structural and histological  
47 features of mammalian skeletal muscle are highly preserved in zebrafish<sup>11</sup>. To date, two  
48 approaches have been used to study the effect of the loss of desmin in zebrafish. On one hand, it  
49 was shown that morpholino-mediated knockdown of desmin causes skeletal and cardiac muscle  
50 myopathy<sup>12,13</sup>. On the other hand, Ramsbacher et al. studied a desmin mutant line (*desma<sup>sa5</sup>*),  
51 generated by ENU mutagenesis, which causes a truncation mutation approximately half way along  
52 the molecule, that also presented with skeletal and cardiac muscle phenotype<sup>14</sup>.

53 Gene duplications are common in zebrafish and most duplicated genes have similar  
54 functions to their human orthologs. Alternatively, paralogs can be expressed in different tissues or  
55 stages of development and have distinct functions to their human orthologs. Humans carry a single  
56 copy of the *DES* gene whereas two desmin genes (*desma* and *desmb*) are found in zebrafish<sup>13</sup>.  
57 Previous work has not established the tissue specific distribution and role of these two desmin  
58 paralogs.

59 Here, we report the spatiotemporal expression pattern of the two desmin paralogs in  
60 zebrafish, as well as the generation using CRISPR/Cas9 and characterization of putative null  
61 zebrafish mutant lines for each of the desmin paralogs. We show that *desma* and *desmb* are  
62 expressed in skeletal muscle until 72-hour post-fertilization (hpf). After 72 hpf, expression of  
63 *desmb* shifts to gut smooth muscle. Putative null mutation of each gene does not affect viability  
64 and adults do not develop any overt phenotype. However, altered calcium flux was observed in  
65 *desma*-KO myofibres. Surprisingly, *desma;desmb* double mutants also survive to adulthood with  
66 no sign of muscle defect. These results show that loss-of-function of desmin genes by mutations  
67 in the first coding exon result in a mild phenotype with no visible muscle degeneration but altered  
68 calcium flux, in contrast to morpholino-mediated knockdown models and the *desma*<sup>sa5</sup> allele.

## 69 RESULTS

### 70 Zebrafish desmin genes

71 Zebrafish have two *desmin* orthologs, *desma* (*desmin a*) and *desmb* (*desmin b*), which are located  
72 on chromosome 9 and 6, respectively. *Desma* and *desmb* paralogs share 81% and 83% identity  
73 with human *DES* gene. Although a single transcript is known to be encoded by human *DES* gene,  
74 in ENSEMBL two isoforms are predicted to be transcribed from *desma*, *desma-1* mRNA coding  
75 for a 488 amino acid protein (predicted molecular weight of 55.7 kDa) and *desma-2* mRNA coding  
76 for a 473 amino acid protein (predicted molecular weight of 54.1 kDa). In *desma-2* transcript, exon  
77 9 is skipped, corresponding to 15 amino acid located in the tail domain of Desma-1 protein  
78 (Supplementary Fig. S1). The 473 amino acid Desmb protein is predicted to have a molecular  
79 weight of 54.2 kDa. At the amino acid level, Desma-1, Desma-2 and Desmb show 80%, 82% and  
80 83% similarity with human desmin protein.

### 81 Differential expression of desmin transcripts during zebrafish development

82 We analyzed the spatiotemporal expression patterns of *desma* and *desmb* genes during zebrafish  
83 development at several stages beginning from somitogenesis until 5 days post fertilization (dpf)  
84 by whole mount *in situ* hybridization (ISH). For detecting both *desma* transcripts (*desma-2* lacks  
85 exon 9), we synthesized an antisense probe by using a forward primer binding to exon 1 and a  
86 reverse primer binding to exon 10 (Supplementary Fig. S1). No specific staining was observed in  
87 embryos treated with sense probes for each gene (Supplementary Fig. S2). *Desma* was first

88 detected at 11 hpf in adaxial slow muscle precursor cells when the first somites form and remained  
89 strongly expressed in somites at all examined stages (Fig. 1a). *Desma* was also expressed in the  
90 developing heart from 35 hpf (Fig. 1b). Cryosections of 72 hpf embryos showed that *desma* was  
91 distributed in the entire somite, including epaxial and hypaxial muscles (Fig. 1c). By 72 hpf, *desma*  
92 was expressed in cranial muscles including external ocular muscles, opercular muscles and  
93 mandibular muscles (Fig. 1d). At 96 hpf, transversal sections revealed *desma* expression at the  
94 anterior intestine (Fig. 1d, upper panel). At 72, 96 and 120 hpf, expression of *desma* in pectoral  
95 fin muscles was clearly visible (Fig. 1d). *Desmb* had an overlapping expression pattern to *desma*  
96 from the beginning of somitogenesis until 72 hpf, including staining in trunk somites and heart  
97 (Fig. 1a, b). At 72 hpf, somitic expression of *desmb* dramatically decreased with a residual  
98 expression in the lateral edges of the myotome. By contrast, strong signal of *desmb* transcripts was  
99 detected around the gut throughout the length of the intestine (Fig. 1a, c, e). Similar to *desma*,  
100 *desmb* was also expressed in pectoral fin muscles, operculum muscles and mandibular muscles at  
101 72 hpf (Fig. 1e). These results indicate that *desma* and *desmb* expression partially overlap during  
102 zebrafish muscle development. As the gut develops, *desmb* expression shifts from somitic muscle  
103 to gut smooth muscle.

#### 104 **Generation of *desma* and *desmb* knockout zebrafish lines**

105 *Desma* and *desmb* mutant zebrafish lines were generated by using CRISPR/Cas9 genome editing.  
106 The *desma*<sup>kg97</sup> line exhibited 2 bp deletion and 4 bp insertion in the first exon  
107 (g.198\_99delGAinsTGAT, NC\_007120.7) leading to a frameshift at amino acid 45 and a  
108 premature stop codon after four amino acids. In the *desmb*<sup>kg156</sup> mutant line, a 5 bp deletion in exon  
109 1 (c.245\_249delCTTAT, NM\_001077452.1) resulted in a frameshift at amino acid 82 and  
110 introduced a premature stop codon after three amino acids (Fig. 2a). Heterozygous mutants showed  
111 no defect and homozygous mutant embryos and larvae developed relatively normally, at least for  
112 the first few days (Fig. 2b-f).

#### 113 **Expression of *desma* and *desmb* in knockout lines**

114 Mutations were predicted to trigger nonsense-mediated decay of mRNA or synthesis of short  
115 truncated polypeptides. As expected, qRT-PCR revealed a significant decrease of *desma*  
116 transcripts in *desma*<sup>kg97</sup> homozygous embryos ( $P=0.0119$ , Mann-Whitney U), while *desmb*

117 transcripts were significantly decreased in *desmb*<sup>kg156</sup> homozygous embryos at 96 hpf compared to  
118 wild type (WT) ( $P=0.0079$ , Mann-Whitney U) (Fig. 2b). Consistent with El-Brolosy et al.<sup>15</sup>, weak  
119 *desmb* or *desma* mRNA up-regulation may occur in the respective mutant embryos (Fig. 2b).

120 In order to investigate the potential compensatory effect of *desmin* paralog upregulation in  
121 mutant embryos, expression patterns of *desmb* and *desma* transcripts were determined in *desma*<sup>kg97</sup>  
122 or *desmb*<sup>kg156</sup> homozygous mutant embryos, respectively. In *desma*<sup>kg97/kg97</sup> embryos, the expression  
123 pattern of *desmb* transcripts (Fig. 2c) was similar to that of wild-type embryos (Fig. 1a). Somitic  
124 expression of *desmb* was observed in *desma*<sup>kg97/kg97</sup> at 48 hpf, and a shift towards gut expression  
125 after 72 hpf. Beyond 72 hpf, no *desmb* staining was detected in somites of *desma*<sup>kg97/kg97</sup> embryos.  
126 In *desmb*<sup>kg156/kg156</sup> embryos, *desma* was still strongly expressed in somites and visible in the  
127 anterior intestine at 96 hpf (Fig. 2c). In order to confirm the loss-of-function of desmin in mutants  
128 at the protein level, expression of Desma and Desmb in WT, *desma*<sup>kg97</sup> or *desmb*<sup>kg156</sup> homozygous  
129 embryos at 96 hpf was determined by immunofluorescent staining using a desmin antibody  
130 recognizing both proteins (Fig. 2d-f). In WT embryos, desmin staining was detected in both  
131 somites and gut (Fig. 2d). As expected from ISH results, somitic expression was lost and gut was  
132 preferentially stained in *desma*<sup>kg97/kg97</sup> mutants (Fig. 2f). In *desmb*<sup>kg156/kg156</sup> mutants, expression in  
133 somites and anterior intestine were preserved while staining of the middle and posterior intestine  
134 was lost (Fig. 2e). We conclude that mutation of each gene reduces the cognate mRNA and protein  
135 at all stages examined and that compensation by up-regulation of the unmutated paralogous gene  
136 is at best very weak.

### 137 **General larval characteristics of desmin mutants**

138 In order to evaluate the effects of the absence of *desma* or *desmb* on development, WT, *desma*<sup>kg97</sup>  
139 and *desmb*<sup>kg156</sup> homozygous embryos/larvae were compared. No significant difference was  
140 observed in the number of viable eggs between *desma*<sup>kg97/kg97</sup> and WT ( $P=0.6842$ , Mann-Whitney  
141 U) or *desmb*<sup>kg156/kg156</sup> and WT ( $P=0.9654$ , Mann-Whitney U) (Fig. 3a). Hatching period (48-72  
142 hpf<sup>16</sup>) is a critical process in embryonic development and reduction in the hatching rate could be  
143 associated with reduced muscle function<sup>17</sup>. The time course showed that although different  
144 hatching times were observed between groups, no significant difference was found between  
145 hatching rates of mutant and WT embryos at 72 hpf with over 94% of embryos hatched

146 (*desma*<sup>kg97/kg97</sup> vs. WT,  $P=0.9902$ ; *desmb*<sup>kg156/kg156</sup> vs WT,  $P=0.3186$ , repeated measures two-way  
147 ANOVA, Bonferroni post *hoc* test) (Fig. 3b).

148 Similar mortality rates were observed with no significant difference between homozygous  
149 mutants of *desma*<sup>kg97</sup> or *desmb*<sup>kg156</sup> and WT embryos (*desma*<sup>kg97/kg97</sup> vs. WT,  $P=0.1287$ ;  
150 *desmb*<sup>kg156/kg156</sup> vs. WT,  $P=0.6239$ , repeated measures two-way ANOVA) (Fig. 3d). Finally,  
151 among surviving larvae, no statistically significant difference in body length was observed  
152 between WT and mutant groups ( $P=0.2036$  for WT vs. *desma*<sup>kg97/kg97</sup>;  $P=0.1893$  for WT vs.  
153 *desmb*<sup>kg156/kg156</sup>, Mann-Whitney U) (Fig. 3c).

#### 154 **Mutant larvae show no neuromuscular defect**

155 Muscle fibre integrity and somite morphology length were investigated by staining muscle actin  
156 with rhodamine phalloidin in 96 hpf embryos (Fig. 3e). At this stage, mainly *desma* is expressed  
157 in somites. No muscle lesion or detachment of fibres was observed in mutants and no significant  
158 difference was found in somitic length between mutants and WT ( $P=0.7912$  for WT vs.  
159 *desma*<sup>kg97/kg97</sup>;  $P=0.4923$  for WT vs. *desmb*<sup>kg156/kg156</sup>, Mann-Whitney U) (Fig. 3f).

160 Touch-evoked response assay is a widely used method to assess neuromuscular function  
161 in 48 hpf zebrafish embryos<sup>18</sup>. We performed motility experiments in a blinded manner on siblings  
162 from three groups of heterozygous mutant in-crosses and genotyped them after. First, the average  
163 escape time of siblings from *desma*<sup>kg97/+</sup> in-crosses was assessed and no significant difference was  
164 found in *desma*<sup>kg97</sup> heterozygous ( $P=0.122$ , Mann-Whitney U) or homozygous ( $P=0.5529$ , Mann-  
165 Whitney U) mutants compared to WT (Fig. 3g). Similarly, no significant difference in the average  
166 escape time was found in *desmb*<sup>kg156</sup> heterozygous ( $P=0.3968$ , Mann-Whitney U) or homozygous  
167 ( $P=0.6131$ , Mann-Whitney U) mutants compared to WT (Fig. 3h). Since both *desma* and *desmb*  
168 are expressed in somites up to this stage (48 hpf) and might potentially compensate for the absence  
169 of each other, we finally evaluated the effect of the absence of both proteins in siblings from  
170 *desma*<sup>kg97/+</sup>; *desmb*<sup>kg156/kg156</sup> double mutants. No significant difference in the average escape time  
171 was found in homozygous double mutants (*desma*<sup>kg97/kg97</sup>; *desmb*<sup>kg156/kg156</sup>) compared to  
172 *desma*<sup>+/+</sup>; *desmb*<sup>kg156/kg156</sup> ( $P=0.3165$ , Mann-Whitney U) and in *desma*<sup>kg97/+</sup>; *desmb*<sup>kg156/kg156</sup>  
173 embryos compared to *desma*<sup>+/+</sup>; *desmb*<sup>kg156/kg156</sup> ( $P = 0.2334$ , Mann-Whitney U) (Fig. 3i).

174

## 175 **Mutant adult skeletal muscle shows no muscle degeneration**

176 Because no skeletal muscle phenotype was observed in mutant larvae, surviving one-year-old  
177 adults were investigated for muscle defects. Some homozygous single and double mutants  
178 survived until adulthood with no sign of behavioral defect. Western blot was performed using  
179 myotomal skeletal muscle protein extracts isolated from adult fish (WT, homozygous and  
180 heterozygous *desma*<sup>kg97</sup> mutants, homozygous and heterozygous *desmb*<sup>kg156</sup> mutants and  
181 *desma*<sup>kg97/kg97</sup>;*desmb*<sup>kg156/kg156</sup> double mutants). As *desma* was shown to be predominantly  
182 expressed in somites from 72 to 120 hpf, the two bands detected in WT and *desmb*<sup>kg156</sup> mutants  
183 were predicted to correspond to Desma-1 (predicted molecular weight 55.7 kDa) and Desma-2  
184 (predicted molecular weight 54.1 kDa) isoforms. In agreement with that, both bands were absent  
185 in *desma*<sup>kg97</sup> homozygous mutant and double mutants while still expressed in homozygous  
186 *desmb*<sup>kg156</sup> mutant (Fig. 4a). Nevertheless, histopathological examination of hematoxylin-eosin  
187 stained skeletal muscle tissue sections revealed no pathological changes in homozygous single or  
188 double mutants (Fig. 4b). General morphology of skeletal fibre shape and size, integrity of  
189 sarcoplasm was normal. There was an absence of cytoplasmic aggregates, signs of degeneration  
190 or regeneration, internal nuclei, inflammatory cell infiltration, increase in connective or adipose  
191 tissue in interstitium (Fig. 4b). We conclude that fish entirely lacking wild-type desmin generate  
192 and maintain functional skeletal muscle in the context of a zebrafish aquarium.

## 193 **Altered calcium flux in *desma* mutant fibres**

194 Although anatomically apparently wild-type, adult *desma*<sup>kg97/kg97</sup> mutants were physiologically  
195 defective in calcium handling. To investigate amplitude and time course of calcium signals  
196 released in response to a depolarizing voltage stimulus, individual fibres were dissected from WT  
197 (N=8), *desma*<sup>kg97</sup> (N=11) or *desmb*<sup>kg156</sup> (N=8) homozygous mutant 1-year-old fish. Calcium flux  
198 along fibres was monitored in the isolated fibres by Fluo-4 AM after four consecutive depolarizing  
199 stimuli with the amplitude of the current pulse kept constant at 100 nA and the duration increased  
200 by 10 ms at each pulse (Fig. 5a-b). Amplitudes of the calcium emission signals in the first (10 ms)  
201 stimulus and fourth (40 ms) stimulus were compared between mutants and WT. To eliminate  
202 variance induced by amplitude, offset and fibre size differences, amplitude values were baseline  
203 corrected and divided by the diameter of each fibre. Amplitudes of the first or the fourth calcium  
204 transient were significantly lower in *desma*<sup>kg97/kg97</sup> fibres compared to WT fibres ( $P=0.0008$  for

205 first transient;  $P=0.0025$  for fourth transient, Mann-Whitney U) (Fig. 5c-d). In contrast, no  
206 significant difference was found in the amplitude of calcium flux between *desmb*<sup>kg156/kg156</sup> fibres  
207 and WT fibres ( $P=0.0881$  for first transient;  $P=0.6657$  for fourth transient, Mann-Whitney U) (Fig.  
208 5c-d).

209 Time course of the longest calcium transient (40 ms, fourth transient) has been analyzed  
210 for comparing the waveform of the responses and dissecting each phase of the transient. Signals  
211 have been baseline corrected and then normalized. Mean amplitude values as a function of time  
212 were compared between *desma*<sup>kg97/kg97</sup> and WT or *desmb*<sup>kg156/kg156</sup> and WT. No significant  
213 difference was found in the rising and the plateau phases of the recorded transients between the  
214 experimental groups (Figure 5e). However, the decay phase was significantly faster in  
215 *desma*<sup>kg97/kg97</sup> mutant fibres compared to WT (\* indicates  $P<0.05$ , repeated measures ANOVA,  
216 Bonferroni post *hoc* test). No significant difference was found in *desmb*<sup>kg156/kg156</sup> mutant fibres  
217 compared to WT (Fig. 5e).

## 218 DISCUSSION

219 We demonstrated differential expression of *desma* and *desmb* paralogs during zebrafish  
220 development. Although previous studies showed that *desma* is the main gene expressed in somites,  
221 no study did clearly distinguish the spatial and temporal differences in the expression of the two  
222 genes. We showed that until 72 hpf *desma* and *desmb* expression overlap but later in development,  
223 their expression diverges. While *desmb* expression shifts from somites to gut, *desma* remains as  
224 the predominantly expressed paralog in somites. Note that the residual *desmb* expression detected  
225 in the lateral edges of the myotome might reflect a transient expression in new muscle fibres<sup>19</sup>.  
226 Reduction of Desmin protein in adult *desma* mutants confirms that Desma is the major desmin  
227 protein in adult zebrafish skeletal muscle. *Desmb* appears the major desmin in smooth muscle, at  
228 least in the gut. So zebrafish *desmb* mutants may be particularly useful for understanding the role  
229 of desmin in smooth muscle without interference by additional phenotypes from skeletal muscle.  
230 In future studies, it will be necessary to take into account this divergent expression when studying  
231 the role of desmin in zebrafish.

232 Reduced *desma* or *desmb* mRNAs in their respective mutants suggest the mRNAs are  
233 degraded by nonsense-mediated decay, such that only tiny amounts of the severely truncated  
234 proteins would be produced. Such fragments lack the highly conserved  $\alpha$ -helical central rod



235 domain responsible for filament formation and all known protein-protein interaction domains of  
236 Desmin<sup>20</sup>. Intriguingly, no overt phenotype was observed in some double homozygous mutants.  
237 In contrast to desmin morphants where both *desma* and *desmb* were targeted with morpholinos<sup>13</sup>,  
238 we found that *desma*<sup>kg97</sup> or *desmb*<sup>kg156</sup> alleles have no effect on hatching of eggs, mortality rate and  
239 length of larvae. While motility is altered in 48 hpf desmin morphants, no significant alteration  
240 was detected in *desma*<sup>sa5</sup> embryos<sup>13,21</sup>. By reasoning that this could be due to a compensation by  
241 *desmb*, which is still expressed in somites at 48 hpf, we performed motility assays in both single  
242 mutant and double mutant embryos but found no additional neuromuscular defect in larvae mutant  
243 in single or both desmin genes. At the histological level, no sign of muscle degeneration or  
244 disorganisation of fibres was observed in *desma*<sup>kg97</sup> or *desmb*<sup>kg156</sup> mutant skeletal muscles in either  
245 embryos and adults. In contrast, the desmin morphants and *desma*<sup>sa5</sup> mutant muscles of embryos  
246 were disorganized, with disruption of sarcomeres<sup>13,14</sup>. Our findings raise the possibility that a  
247 haploinsufficient dominant effect in *desma*<sup>sa5</sup> mutants may disrupt muscle; such an explanation  
248 would no account for the morphant phenotype. We conclude that at least two further alleles of  
249 *desma* may be needed to resolve these differences: firstly, a deletion allele that would  
250 simultaneously prevent any Desma polypeptide synthesis and any RNA-triggered compensation  
251 and, secondly, an allele lacking morpholino binding ability but nevertheless encoding wild-type  
252 protein to prove that the morphant phenotype is due to *desma* binding.

253 We found that the amplitude of calcium signals released in response to a depolarizing  
254 current stimulus applied to fibres was significantly lower in *desma*<sup>kg97</sup> compared to WT. In  
255 addition, while rising and plateau phases of calcium signals were similar between all groups, the  
256 decay phase was shorter in *desma*<sup>kg97</sup> mutants compared to WT. These results indicate that  
257 mechanisms regulating cytosolic calcium are altered and fibres are not efficient in generating a  
258 long lasting calcium increase in the absence of desmin. These results are concordant with calcium  
259 flux defects observed in desmin mutant mice and hearts of *desma*<sup>sa5</sup> embryos<sup>14</sup>. Our data support  
260 the idea that desmin has a similar role in calcium conduction in skeletal muscle fibres and suggest  
261 that some aspects of the *desma*<sup>sa5</sup> phenotype may reflect loss of function of Desma.

262 Although not the focus of this study, it should be noted that heart and gastrointestinal  
263 development in mutant lines have not been extensively analyzed. No heart oedema such as  
264 observed in desmin morphant or overt morphological abnormality in the gut have been observed  
265 in *desma*<sup>kg97</sup>, *desmb*<sup>kg156</sup> or double mutant embryos and adults.

266 Many loss-of-function mutants not exhibiting an overt phenotype and failing to phenocopy  
267 morphants have been previously reported<sup>22–24</sup>. El-Brolosy et al. proposed transcriptional  
268 adaptation triggered by mutant RNA degradation as a mechanism to explain this discrepancy<sup>15,25</sup>.  
269 According to this model, decay of the mutant mRNA results in upregulation of related genes,  
270 alleviating or suppressing the phenotype observed in morphants. Such adaptation could explain  
271 the milder phenotype observed in mutants created in our study compared to desmin morphants.  
272 However, it has been shown that *desma<sup>sa5</sup>* allele results in a muscle phenotype similar to that of  
273 morphants, even though the *desma<sup>sa5</sup>* allele predicts an in-frame stop codon and no *desma* mRNA  
274 was detected in mutants<sup>14,21</sup>. We also observe a severe reduction in *desma* mRNA in our *desma<sup>kg97</sup>*  
275 mutant. The specific mechanism leading to the absence of mRNA was not investigated either in  
276 *desma<sup>sa5</sup>* mutants or in the present study. It is possible that the *desma<sup>sa5</sup>* allele is not as efficient as  
277 *desma<sup>kg97</sup>* allele in triggering an adaptation mechanism for yet unknown reasons. However, our  
278 data suggest that the compensating gene in fish carrying our *desma* allele is not *desmb*, the only  
279 gene known to have high and extensive homology to *desma*. It will be interesting to compare these  
280 models in the contexts of mRNA decay and transcriptional adaptation. Alternatively, short  
281 truncated polypeptides not detected in Western blot might play a role in this process before being  
282 rapidly degraded. In conclusion, unraveling modifier genes and proteins that compensate for the  
283 loss of desmin in our models will bring further insights in the role of desmin in muscle.

## 284 **METHODS**

### 285 **Ethical approval and zebrafish maintenance**

286 All animal procedures were approved by the Hacettepe University Animal Experimentations Local  
287 Ethics Board (2014/07-08). Adult zebrafish (AB) (*Danio rerio*) were kept in 14/10 hr light-dark  
288 cycle at 28.5°C. Adults are fed twice a day, with dry feed in morning and *Artemia spp.* in evening.  
289 For spawning, male and female fish were placed in a breeding tank with a separator. Next morning  
290 the separator was removed, viable eggs were collected and rinsed in E3 medium (5 mM NaCl, 0.17  
291 mM KCl, 0.33 mM CaCl<sub>2</sub>, 0.33 mM MgSO<sub>4</sub>, 10<sup>-5</sup>% Methylene Blue). Embryos were kept in E3  
292 medium for five days and placed into adult tanks containing system water. Embryos were fed five  
293 times a day with dry feed and *Artemia*.

### 294 **Whole mount *in situ* hybridization**

295 Embryos were fixed in 4% PFA in PBS (w/v) overnight at 4°C, dehydrated in 50% and %100  
296 methanol washes and stored at -20°C at least overnight before use. Probe templates were amplified  
297 from cDNA isolated from 96 hpf wild-type embryos. Reverse primers for antisense probe  
298 contained T3 promoter sequence while forward primers for sense probes contained T7 promoter  
299 sequence. Primers sequences can be found as Supplementary Table S1 online. Digoxigenin-  
300 labelled probes were generated using T3 or T7 RNA polymerases. Whole mount *in situ* mRNA  
301 hybridization was performed as described<sup>26</sup>. Embryos were photographed as on Zeiss Axiophot  
302 with AxioCam (Carl Zeiss, Oberkochen, Germany) using Openlab software (Agilent, Santa Clara,  
303 CA, USA).

#### 304 **Generation of mutant zebrafish lines**

305 CRISPR-Cas9 genome editing was performed as described in Fin et al<sup>24</sup>. CRISPR-Cas9 sgRNAs  
306 showing minimal off-target sites were designed by using the online software ZiFiT Targeter.  
307 Oligos encoding sgRNAs targeting the first exon of *desma* (GRCz11, Chr9: 7539113-7539132,  
308 GGTCACCTCGTAAACTCTGG) and *desmb* (GRCz11, Chr6: 13891417-13891437,  
309 GGCTATACTCGCTCTTATGG) were cloned into pDR274 plasmid (Addgene). sgRNAs were  
310 synthesized using T7 RiboMAX Large Scale RNA production system (Promega) following the  
311 manufacturer's protocol. Transcribed sgRNAs were purified using sodium acetate and ethanol  
312 precipitation and quantified on Qubit fluorometer. Cas9 mRNA was transcribed from pCS2-Cas9  
313 plasmid using mMessage mMachine SP6 Kit (Ambion) and purified by lithium chloride  
314 precipitation. One-cell stage embryos were injected with 2 nl containing 80-200 pg of sgRNA and  
315 100 pg of Cas9 mRNA. At 48 hpf, ten embryos were analysed for mosaicism at targeted loci using  
316 high resolution melt analysis. Injected embryos were raised to adulthood and back-crossed to  
317 identify transmitted mutations in F1 progeny. Homozygotes for each gene were generated by in-  
318 cross of F2 heterozygotes. Primers sequences used for genotyping by Sanger sequencing can be  
319 found as Supplementary Table S1 online.

#### 320 **Quantitative real-time PCR**

321 Total RNA was isolated from a pool of 20 mechanically homogenized embryos at 96 hpf for each  
322 sample (n=8) using TRIzol G (AppliChem) and 500 ng of cDNA was synthesized using  
323 QuantiTect Reverse Transcription Kit (Qiagen) according to manufacturer's protocol. Primer

324 sequences for *desma* (covering both *desma-1* and *desma-2*), *desmb* and *actb1* can be found as  
325 Supplementary Table S1 online. qPCR was performed in triplicates using SensiFAST SYBR No-  
326 ROX Kit (Bioline) in Rotor-Gene 6000 (Corbett Life Science). *Desma* and *desmb* expression  
327 levels were normalized to *actb1* expression, mutant expression levels were calculated relative to  
328 wild-type using  $\Delta\Delta C_t$  method<sup>27</sup>.

### 329 **Protein Extraction and Immunoblotting**

330 For protein extraction, 1-year-old fish were euthanized using overdose of tricaine (MS222, 300  
331 mg/l). Skeletal muscle tissue was immediately dissected and fresh-frozen in liquid nitrogen. Tissue  
332 was pulverized and homogenized in blending buffer (16 M Tris HCl, 200 M EDTA, 20% SDS,  
333 1X protease inhibitor cocktail, volume adjusted to 5 ml with dH<sub>2</sub>O) by sonication on ice. Lysates  
334 were then centrifuged and supernatant transferred in a fresh tube. Total protein concentrations were  
335 determined by bicinchoninic acid Protein Assay (Pierce, 23225). Equal amounts of protein (40  $\mu$ g)  
336 were loaded on a 13% polyacrylamide gel and transferred onto a nitrocellulose membrane using  
337 semi-dry transfer, blocked for one hour at room temperature (5% nonfat dried milk in 0.2 TBS-  
338 T) and probed with anti-desmin antibody (1:1000; Sigma, D8281) overnight at 4°C or anti-lamin  
339 B1 antibody (Abcam, ab90169) followed by appropriate HRP-conjugated secondary antibody.  
340 Chemiluminescence detection was done by using SuperSignal<sup>TM</sup> West Femto Maximum Sensivity  
341 substrate (Thermo Scientific, 34095) in GeneGnome device.

### 342 **Whole-mount Immunofluorescence**

343 96 hpf embryos were fixed in 4% PFA overnight at +4°C and washed with PBTx (0.01 Triton  
344 X-100 in PBS). Embryos were permeabilized in 50  $\mu$ g/ml Proteinase K for 2 hours and re-fixed in  
345 2% PFA for 20 minutes at room temperature. Embryos were blocked in 5% BSA for 2 h at room  
346 temperature and incubated with anti-desmin antibody (1:20; Sigma, D8281) for two overnights.  
347 After two overnight incubations with Alexa-Fluor 488 conjugated secondary antibody, embryos  
348 were mounted with DAPI onto glass bottom dishes for imaging with Zeiss LSM Pascal laser  
349 scanning confocal microscope.

### 350 **Larval Phenotype and Morphology**

351 After successful mating, embryos were collected, counted and recorded for the following rates.  
352 Hatching rate was reported as cumulative percentage of hatched embryos at 24 hpf, 48 hpf and 72

353 hpf. Mortality rate was expressed as the percentage of death embryos for 5 dpf. For body length  
354 measurements, at least 16 embryos at 96 hpf were mounted, photographed (The Imaging Source,  
355 DFK 41AU02) and measured from the mouth tip to the tail base using ImageJ (Version 1.49u).  
356 Values for body length were presented as mean body length in cm. All the experiments except  
357 body length measurements (three times) were performed at least eight times.

### 358 **Phalloidin Staining**

359 Phalloidin staining was performed on 96 hpf embryos (N=8) as described<sup>28</sup>. Following fixation in  
360 4% PFA and permeabilization with 50 µg/ml Proteinase K, embryos were incubated in Alexa-  
361 Fluor 488 conjugated Phalloidin (Invitrogen, A12379) overnight at +4°C. Embryos were then  
362 mounted onto glass bottom dishes and photographed with Zeiss LSM Pascal laser scanning  
363 confocal microscope. Somite lengths were measured by using ImageJ (Version 1.49u).

### 364 **Hematoxylin Eosin Staining**

365 Adult zebrafish were freshly frozen in methyl-butanol cooled down in liquid nitrogen and then  
366 taken into O.C.T compound for sectioning. Tissue sections were incubated in hematoxylin for 5  
367 minutes, 1% acid-alcohol solution for 1 minute, 1% ammoniac for 1 minute, eosin solution for 3  
368 minutes respectively by washing with distilled water in between steps. Finally, sections were  
369 washed with alcohol and xylene, and mounted. Sections were scanned with Nikon Eclipse E-400  
370 microscope and photographed by DXM 1200F digital camera.

### 371 **Motility Assay**

372 For motility assay 48 hpf embryos from in-crosses of *desma*<sup>kg97/+</sup>, *desmb*<sup>kg156/+</sup> or  
373 *desma*<sup>kg97/+</sup>; *desmb*<sup>kg156/kg156</sup> adults were used. Motility assays were performed by previously  
374 described protocol<sup>18</sup>. A petri dish was placed on a transparent sheet with concentric circles 5 mm  
375 apart. One embryo at a time was positioned in the centre of the dish and stimulated using a  
376 dissection needle. The escape response of the embryo was recorded using a high-speed camera  
377 (Huawei, Mate 10 Lite, 16 MP, 120 fps). The movements of the embryo—midpoint between the  
378 two eyes—were tracked using a custom software that works based on template matching  
379 algorithm. The elapsed time between the last frame before touch stimulus and the first frame after  
380 the body of the fish contacts the 10 mm circle was computed from the digitized embryo movements

381 with a resolution of 8.3 ms (120 fps). Experiments were performed blindly and after video  
382 accusation, DNA was extracted from each embryo for genotyping.

### 383 **Calcium Flux**

384 1-year-old fish were euthanized using overdose of tricaine (MS222, 300 mg/l). After removal of  
385 the skin, tissue samples were incubated into 5 mg/ml collagenase solution in PBS (without Ca<sup>2+</sup>  
386 and Mg<sup>2+</sup>) at 28.5 °C for 20 minutes on a shaker at 50 rpm. Samples have been triturated gently  
387 under dissecting microscope in order to dissociate muscle fibres from the tissue components until  
388 rode-shaped muscle fibres were obtained. Dissociated fibres were incubated in DMEM containing  
389 10% FBS and 1% antibiotic-antimycotic overnight at 28.5 °C and 5% CO<sub>2</sub> environment. On the  
390 following day, fibres were incubated in 2.5 µM Fluo-4 AM for 20 minutes in 5% CO<sub>2</sub>. Under a  
391 laser scanning confocal microscope (Zeiss LSM Pascal), glass microelectrodes (filled with 3M  
392 KCl) were inserted into muscle fibres in a current clamp mode<sup>29</sup>. A depolarizing current stimulus  
393 was delivered through the microelectrode to excite the fibre and evoke a calcium signal. The  
394 evoked calcium-specific fluorescent emission signal was recorded in “Line Scan” mode of  
395 confocal microscope, supplying information about a line cross sectioning the muscle fibre at a high  
396 frequency in tandem with the electrical recordings. Data were analyzed in MATLAB (The  
397 MathWorks, Inc). The stimulus waveform, which consisted of four consecutive pulses increasing  
398 in duration, was used in all the experiments. The amplitude of the current pulse was kept constant  
399 at 100 nA while the durations were 10 ms, 20 ms, 30 ms, 40 ms respectively. Experiments were  
400 done by using three WT, three *desma*<sup>kg97/kg97</sup> and two *desmb*<sup>kg156/kg156</sup> fish and at least eight fibres  
401 from each group were recorded.

### 402 **Statistics**

403 Data were statistically analyzed by GraphPad Prism 8 (GraphPad Software Inc.) by nonparametric  
404 Mann-Whitney U test (Two-tailed) when two groups were compared. The results were considered  
405 significant when  $P < 0.05$ . For analysis of time course experiments (hatching rate, mortality rate  
406 and time course calcium flux), repeated measures two-way ANOVA was used and Bonferroni post  
407 *hoc* test was used for multiple comparisons. All error bars were presented as mean±SEM and bars  
408 were represented as median.

409

## 410 **Acknowledgements**

411 This work was supported by The Scientific and Technological Research Council of Turkey, Project  
412 no. 214S174 to P.R.D.

## 413 **Competing interests**

414 The author(s) declare no competing interests.

## 415 **Author Contributions**

416 P.R.D. designed, P.R.D. and S.M.H. supervised the study. G.K.K. wrote the paper, E.K.M. made  
417 contribution to writing the paper and assembled the figures. G.K.K., E.K.M, C.K., S.U., B.S., B.E.,  
418 I.U., N.D., B.T. and N.P. performed the experiments and/or analyzed the results. All authors  
419 interpreted the data and edited the manuscript.

## 420 **Data Availability**

421 Supporting information is available in Supplementary files and further information is available  
422 from the corresponding author upon request.

## 423 **References**

- 424 1. Clemen, C. S., Herrmann, H., Strelkov, S. V. & Schröder, R. Desminopathies: Pathology  
425 and mechanisms. *Acta Neuropathologica* (2013) doi:10.1007/s00401-012-1057-6.
- 426 2. Dagvadorj, A. *et al.* Respiratory insufficiency in desminopathy patients caused by  
427 introduction of proline residues in desmin C-terminal  $\alpha$ -helical segment. *Muscle and*  
428 *Nerve* (2003) doi:10.1002/mus.10370.
- 429 3. Ariza, A. *et al.* Desmin myopathy: a multisystem disorder involving skeletal, cardiac, and  
430 smooth muscle. *Hum. Pathol.* (1995) doi:10.1016/0046-8177(95)90095-0.
- 431 4. Goldfarb, L. G. *et al.* Missense mutations in desmin associated with familial cardiac and  
432 skeletal myopathy. *Nat. Genet.* (1998) doi:10.1038/1300.
- 433 5. Cetin, N. *et al.* A novel desmin mutation leading to autosomal recessive limb-girdle  
434 muscular dystrophy: distinct histopathological outcomes compared with desminopathies.  
435 *J. Med. Genet.* **50**, 437–43 (2013).
- 436 6. Bär, H. *et al.* Conspicuous involvement of desmin tail mutations in diverse cardiac and

- 437 skeletal myopathies. *Hum. Mutat.* (2007) doi:10.1002/humu.20459.
- 438 7. Li, Z. *et al.* Cardiovascular lesions and skeletal myopathy in mice lacking desmin. *Dev.*  
439 *Biol.* (1996) doi:10.1006/dbio.1996.0122.
- 440 8. Milner, D. J., Weitzer, G., Tran, D., Bradley, A. & Capetanaki, Y. Disruption of muscle  
441 architecture and myocardial degeneration in mice lacking desmin. *J. Cell Biol.* (1996)  
442 doi:10.1083/jcb.134.5.1255.
- 443 9. Lin, Y. Y. Muscle diseases in the zebrafish. *Neuromuscular Disorders* (2012)  
444 doi:10.1016/j.nmd.2012.04.007.
- 445 10. Berger, J. & Currie, P. D. Zebrafish models flex their muscles to shed light on muscular  
446 dystrophies. *Dis. Model. Mech.* **5**, 726–32 (2012).
- 447 11. Gibbs, E. M., Horstick, E. J. & Dowling, J. J. Swimming into prominence: the zebrafish as  
448 a valuable tool for studying human myopathies and muscular dystrophies. *FEBS J.* **280**,  
449 4187–97 (2013).
- 450 12. Vogel, B. *et al.* In-vivo characterization of human dilated cardiomyopathy genes in  
451 zebrafish. *Biochem. Biophys. Res. Commun.* **390**, 516–522 (2009).
- 452 13. Li, M., Andersson-Lendahl, M., Sejersen, T. & Arner, A. Knockdown of desmin in  
453 zebrafish larvae affects interfilament spacing and mechanical properties of skeletal  
454 muscle. *J. Gen. Physiol.* **141**, 335–345 (2013).
- 455 14. Ramspacher, C. *et al.* Developmental Alterations in Heart Biomechanics and Skeletal  
456 Muscle Function in Desmin Mutants Suggest an Early Pathological Root for  
457 Desminopathies. *Cell Rep.* **11**, 1564–76 (2015).
- 458 15. El-Brolosy, M. A. *et al.* Genetic compensation triggered by mutant mRNA degradation.  
459 *Nature* **568**, 193–197 (2019).
- 460 16. Kimmel, C. B., Ballard, W. W., Kimmel, S. R., Ullmann, B. & Schilling, T. F. Stages of  
461 Embryonic Development of the Zebrafish. *Dev. Dyn.* **203**, 253–310 (1995).
- 462 17. Skobo, T. *et al.* Zebrafish *ambra1a* and *ambra1b* knockdown impairs skeletal muscle  
463 development. *PLoS One* (2014) doi:10.1371/journal.pone.0099210.
- 464 18. Goody, M. F. *et al.* NAD<sup>+</sup> Biosynthesis Ameliorates a Zebrafish Model of Muscular  
465 Dystrophy. *PLoS Biol.* (2012) doi:10.1371/journal.pbio.1001409.
- 466 19. Campbell, J. M., Hartjes, K. a, Nelson, T. J., Xu, X. & Ekker, S. C. New and TALEnted  
467 genome engineering toolbox. *Circ. Res.* **113**, 571–87 (2013).



- 468 20. Hnia, K., Ramspacher, C., Vermot, J. & Laporte, J. Desmin in muscle and associated  
469 diseases: beyond the structural function. *Cell and Tissue Research* (2015)  
470 doi:10.1007/s00441-014-2016-4.
- 471 21. Ramspacher, C. *et al.* Developmental Alterations in Heart Biomechanics and Skeletal  
472 Muscle Function in Desmin Mutants Suggest an Early Pathological Root for  
473 Desminopathies. *Cell Rep.* **11**, 1564–1576 (2015).
- 474 22. Kok, F. O. *et al.* Reverse genetic screening reveals poor correlation between morpholino-  
475 induced and mutant phenotypes in zebrafish. *Dev. Cell* (2015)  
476 doi:10.1016/j.devcel.2014.11.018.
- 477 23. Law, S. H. W. & Sargent, T. D. The serine-threonine protein kinase PAK4 is dispensable  
478 in zebrafish: Identification of a morpholino-generated pseudophenotype. *PLoS One* (2014)  
479 doi:10.1371/journal.pone.0100268.
- 480 24. Fin, L., Bergamin, G., Steiner, R. A. & Hughes, S. M. The Cannabinoid Receptor  
481 Interacting Proteins 1 of zebrafish are not required for morphological development,  
482 viability or fertility. *Sci. Rep.* **7**, 1–9 (2017).
- 483 25. Rossi, A. *et al.* Genetic compensation induced by deleterious mutations but not gene  
484 knockdowns. *Nature* **524**, 230–233 (2015).
- 485 26. Hinits, Y. & Hughes, S. M. Mef2s are required for thick filament formation in nascent  
486 muscle fibres. *Development* (2007) doi:10.1242/dev.007088.
- 487 27. Schmittgen, T. D. & Livak, K. J. Analyzing real-time PCR data by the comparative CT  
488 method. *Nat. Protoc.* (2008) doi:10.1038/nprot.2008.73.
- 489 28. Goody, M. & Henry, C. <http://www.bio-protocol.org/e786> Vol 3, Iss 11, Jun 05, 2013.  
490 *Bio-Protocol* (2013).
- 491 29. Purali, N. Fast calcium transients translate the distribution and conduction of neural  
492 activity in different regions of a single sensory neuron. *Invertebr. Neurosci.* (2017)  
493 doi:10.1007/s10158-017-0201-3.

494  
495  
496  
497  
498

499

## 500 **Figure Legends**

501 **Fig. 1. Whole mount *in situ* mRNA hybridisation of embryos at the indicated stages for**  
502 **antisense probes to *desma* and *desmb*.** (a) Lateral views are anterior to top, dorsal to left for 13-  
503 22 hpf; anterior to left except 11 hpf which is a dorsal view. 48-120 hpf whole mounts are anterior  
504 to left, dorsal to top. Scale bar: 250  $\mu$ m. (b) Arrows indicate heart in frontal view for left panel  
505 (*desma*) and ventral view for right panel (*desmb*) of 35 hpf embryos. (c) Transversal sections where  
506 dorsal is top. (d) Upper left panel is a lateral view at 96 hpf, scale bar: 250  $\mu$ m. Dashed line  
507 represents the position of the transversal section in upper right panel where dorsal is top, scale bar:  
508 100  $\mu$ m. Lower panels are lateral views of zebrafish heads at 72 and 120 hpf treated with *desma*  
509 probe. Scale bar: 100  $\mu$ m. (e) Left panel is a ventral view with anterior at top. Right panels are  
510 lateral views. Ai, anterior intestine; eom, extraocular muscles; fast, fast muscles; fm, pectoral fin  
511 muscles; hm, hypaxial muscles; mdm, mandibular muscles; om, opercular muscles; slow, slow  
512 muscles; som, somites. Scale bar: 250  $\mu$ m.

513 **Fig. 2. Generation of *desma* and *desmb* knockout lines.** (a) Alignments and chromatograms of  
514 wild-type DNA sequences with mutant alleles, and predicted mutant polypeptide sequences. In  
515 DNA sequences, yellow highlights gRNA target sequence, hyphens show deleted bases, inserted  
516 bases are indicated in red font. In protein sequences, the first residue affected by the frameshift is  
517 indicated in red font, asterisks represent early stop codons. (b) Quantitative real-time PCR results  
518 showing the expression of *desma* mRNA (upper graphic) and *desmb* mRNA (lower graphic) in  
519 wild-type and homozygous mutant 96 hpf embryos (N=5). A significant decrease of *desma*  
520 transcripts in *desma*<sup>kg97</sup> homozygous embryos ( $P=0.0119$ , Mann-Whitney U) was observed while  
521 *desmb* transcripts were significantly decreased in *desmb*<sup>kg156</sup> homozygous embryos at 96 hpf  
522 compared to WT ( $P=0.0079$ , Mann-Whitney U). (c) Left panel shows whole mount *in situ* mRNA  
523 hybridisation of *desma*<sup>kg97</sup> homozygous embryos at the indicated stages for antisense probes to  
524 *desmb*. Right panel shows whole mount *in situ* mRNA hybridisation of *desmb*<sup>kg156</sup> homozygous  
525 embryos at the indicated stages for antisense probes to *desma*. Scale bar: 250  $\mu$ m. Ai, anterior  
526 intestine; som, somites. (d-f) Whole mount immunofluorescence staining of desmin with an anti-  
527 desmin polyclonal antibody (Sigma, D8281) recognizing both Desma and Desmb, in wild-type  
528 and mutant 96 hpf embryos. Scale bar: 500  $\mu$ m. Boxes with dashed lines delineate areas that were

529 zoomed and focused on intestine. Pictures showing DAPI staining of each embryo are included at  
530 their bottom right. (d) Upper panel is lateral view of a WT embryo with anterior to left, dorsal to  
531 top. Lower panel is ventral view with anterior to left, arrowheads indicate the gut. (e) Upper panels  
532 are lateral views of *desmb<sup>kg156/kg156</sup>* embryo with anterior to left, dorsal to top. Lower left panel  
533 shows anterior intestine (orange arrowheads), lower right panel shows middle and posterior  
534 intestine (white arrowheads). (f) Lateral view of *desma<sup>kg97/kg97</sup>* with anterior to left, dorsal to top.

535 **Fig. 3. Evaluation of neuromuscular defect in mutant larvae.** (a) The number of viable embryos  
536 after successful mating of WT fish (n=10) compared to homozygous *desma<sup>kg97</sup>* (n=10) ( $P=0.6842$ ,  
537 Mann-Whitney U) or homozygous *desmb<sup>kg156</sup>* (n=8) ( $P=0.9654$ , Mann-Whitney U) fish. (b)  
538 Comparison of hatching rate between homozygous mutants and WT 24, 48 and 72 hpf embryos  
539 At 72 hpf, no significant difference in the hatching rate was found between mutants and WT  
540 (*desma<sup>kg97/kg97</sup>* vs. WT,  $P=0.9902$ ; *desmb<sup>kg156/kg156</sup>* vs WT,  $P=0.3186$ , repeated measures two-way  
541 ANOVA, Bonferroni post *hoc* test) (c) Body length of 96 hpf WT (N=18) and homozygous  
542 *desma<sup>kg97</sup>* (N=25) or homozygous *desmb<sup>kg156</sup>* (N=16) mutant embryos ( $P=0.2036$  for WT vs.  
543 *desma<sup>kg97/kg97</sup>*;  $P=0.1893$  for WT vs. *desmb<sup>kg156/kg156</sup>*, Mann-Whitney U). (d) Cumulative mortality  
544 rate from 1 to 5 dpf homozygous *desma<sup>kg97</sup>* mutants (N=1247) compared to WT (N=2460)  
545 ( $P=0.1287$ , repeated measures two-way ANOVA, Bonferroni post *hoc* test) and homozygous  
546 *desmb<sup>kg156</sup>* mutants (N=2615) compared to WT ( $P=0.6239$ , repeated measures two-way ANOVA,  
547 Bonferroni post *hoc* test). e. Optical sections of the mid-trunk region of WT and homozygous  
548 mutants 96 hpf embryos stained with phalloidin (N=8). Scale bars: 50  $\mu\text{m}$ . (f) Somite lengths ( $\mu\text{m}$ ,  
549 N=8) were measured from optical sections of WT and mutant embryos stained with phalloidin  
550 ( $P=0.7912$  for WT vs. *desma<sup>kg97/kg97</sup>*;  $P=0.4923$  for WT vs. *desmb<sup>kg156/kg156</sup>*, Mann-Whitney U). (g-  
551 i) Touch-evoked escape time (ms) of 48 hpf embryos. Motility experiments were performed blind  
552 on siblings from (g) *desma<sup>kg97/+</sup>*, (h) *desmb<sup>kg156/+</sup>* or (i) *desma<sup>kg97/+</sup>;desmb<sup>kg156/kg156</sup>* in-crosses  
553 followed by *post hoc* genotyping. g. Heterozygous *desma<sup>kg97</sup>* embryos (N=23) were compared to  
554 WT (N=9) ( $P=0.122$ , Mann-Whitney U) and *desma<sup>kg97/kg97</sup>* (N=15) compared to WT ( $P=0.5529$ ,  
555 Mann-Whitney U). h. Heterozygous *desmb<sup>kg156</sup>* embryos (N=6) were compared to WT (N=38)  
556 ( $P=0.3968$ , Mann-Whitney U) and *desmb<sup>kg156/kg156</sup>* (N=6) compared to WT ( $P=0.6131$ , Mann-  
557 Whitney U). i. Homozygous double mutants (N=8) were compared to *desma<sup>+/+</sup>;desmb<sup>kg156/kg156</sup>*  
558 (n=15) ( $P=0.3165$ , Mann-Whitney U) and *desma<sup>kg97/+</sup>;desmb<sup>kg156/kg156</sup>* embryos (n=34) compared  
559 to *desma<sup>+/+</sup>;desmb<sup>kg156/kg156</sup>* ( $P=0.2334$ , Mann-Whitney U).

560 **Figure 4. Desmin protein expression and histological examination of adult skeletal muscle.**

561 **(a)** Immunoblotting of skeletal muscle protein extracts of WT, *desma*<sup>kg97/kg97</sup>, *desma*<sup>kg97/+</sup>,  
562 *desmb*<sup>kg156/kg156</sup>, *desmb*<sup>kg156/+</sup> and *desma*<sup>kg97/kg97</sup>;*desmb*<sup>kg156/kg156</sup> double mutant fish, showing  
563 expression of putative Desma-1 (55.7 kDa) and Desma-2 (54.1 kDa) isoforms. Lamin B1 was  
564 labeled as loading control. **(b)** Transversal cryosections of mid-trunk somites from WT and  
565 homozygous single and double mutant adults stained with hematoxylin eosin showing no  
566 pathological changes. Scale bar: 250  $\mu$ m.

567 **Fig. 5. Calcium flux in isolated fibres.** **(a)** Calcium flux along fibres was monitored in vivo by

568 Fluo-4 AM after four consecutive depolarizing stimuli. Top panel, membrane potential responses  
569 to current stimulus pulses with varying durations of 10, 20, 30, 40 ms with the amplitude of the  
570 current pulse kept constant at 100 mV and the duration increased by 10 ms at each pulse. Middle  
571 panel, evoked calcium transients in line scan mode (*tx*) to current stimuli. Bottom panel, integrated  
572 emission signal as a function of time for each experimental group. **(b)** Membrane potential  
573 response to the first stimulus of 10 ms (top) or to the fourth stimulus of 40 ms. **(c)** Baseline  
574 corrected amplitude divided by fibre diameter ( $\Delta F/\mu$ m) of the calcium emission signals during the  
575 first (10 ms) stimulus and fourth (40 ms) stimulus were compared between mutants and WT. **(e)**  
576 Time course analysis of the baseline corrected and normalized amplitude of the calcium transient  
577 from the longest stimulus (40 ms) was represented as mean amplitude values as a function of time.  
578 Homozygous *desma*<sup>kg97</sup> fibres (N=11, red curve) or homozygous *desmb*<sup>kg156</sup> fibres (N=8, orange  
579 curve) were compared to WT (N=8, blue curve). (\* indicates time points where  $P < 0.05$ , repeated  
580 measures two-way ANOVA, Bonferroni post *hoc* test).

**Figure 1.**

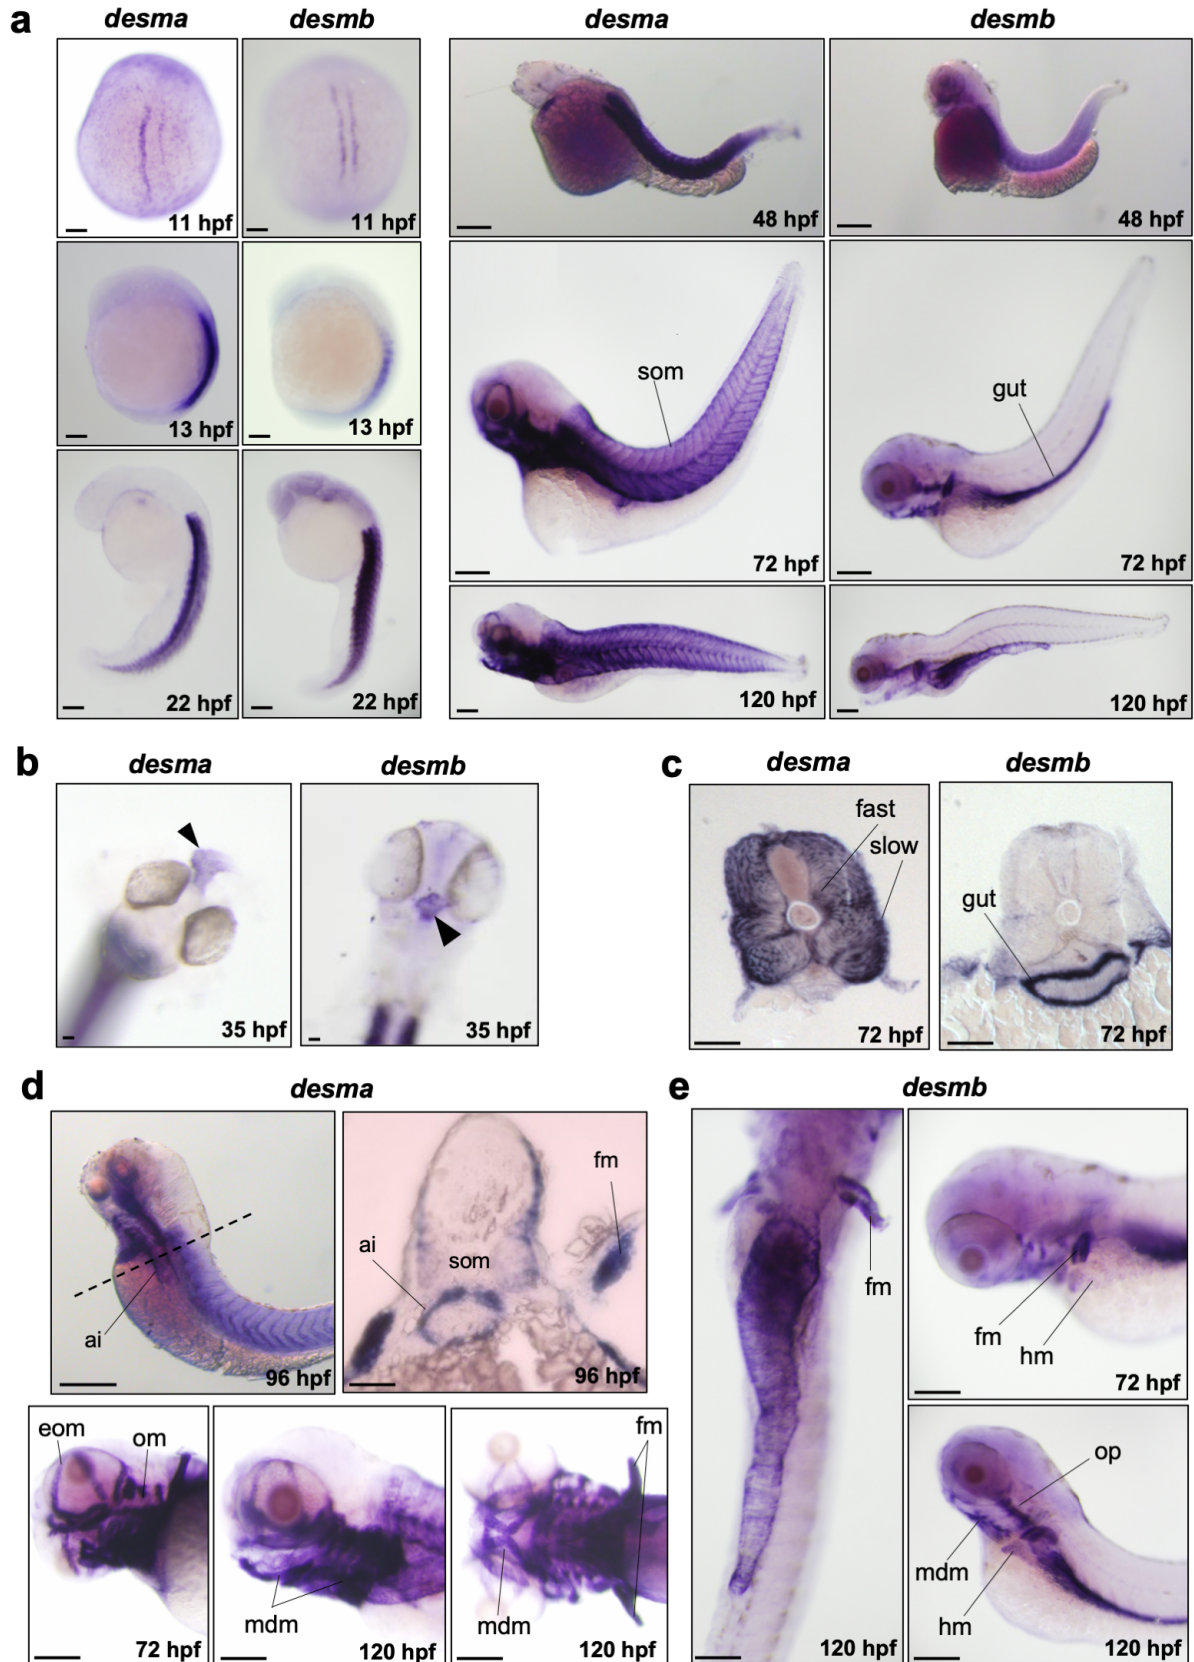

## Figure 2.

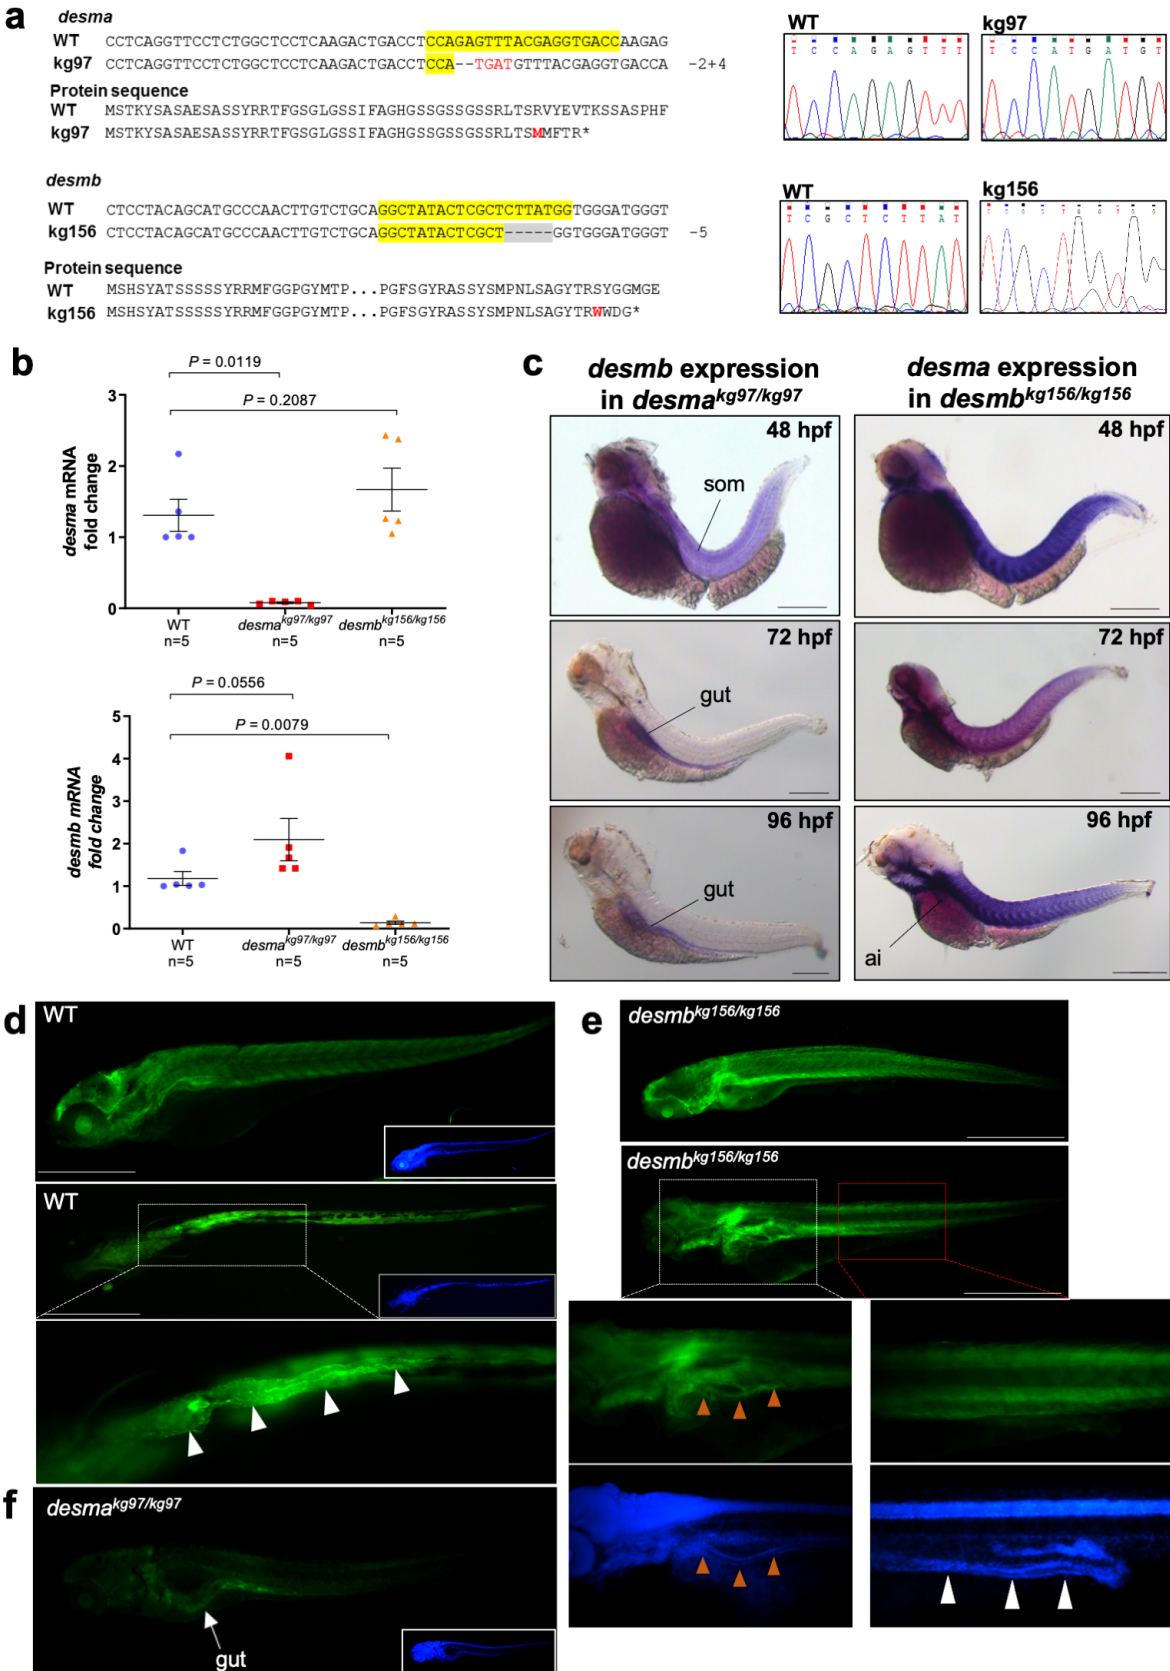

**Figure 3.**

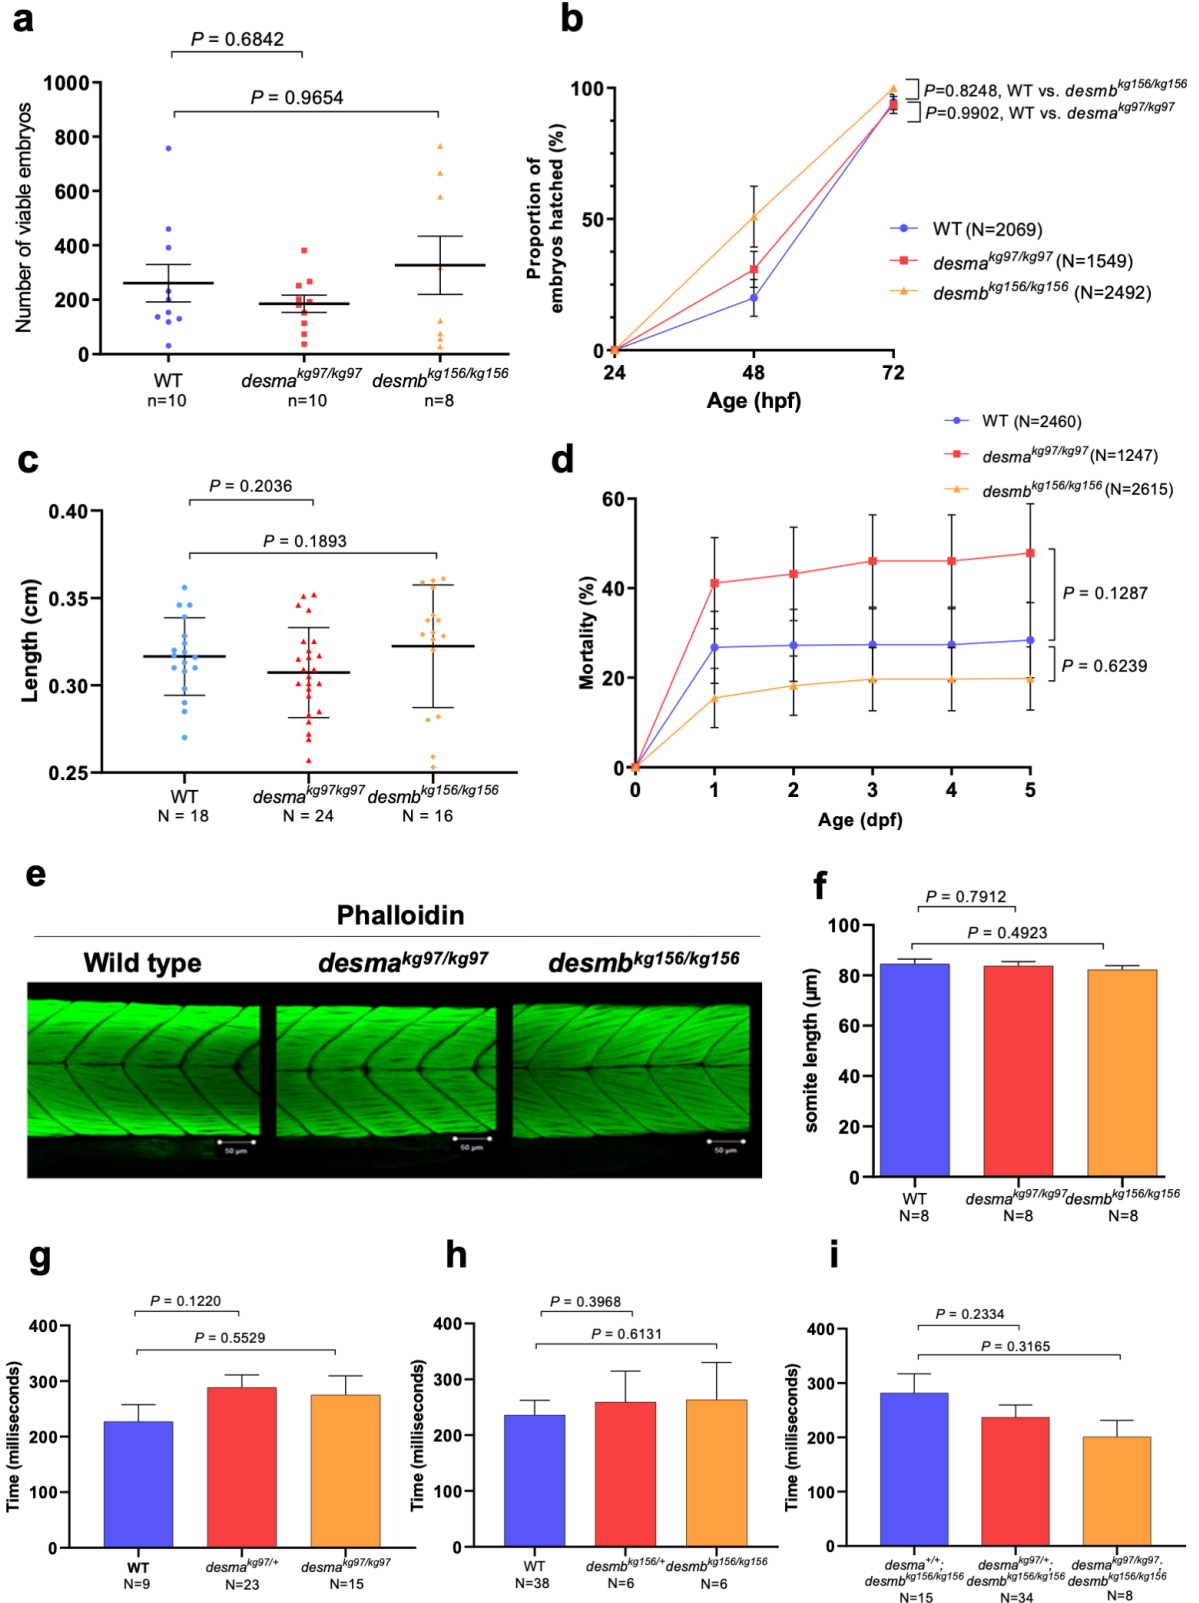

## Figure 4.

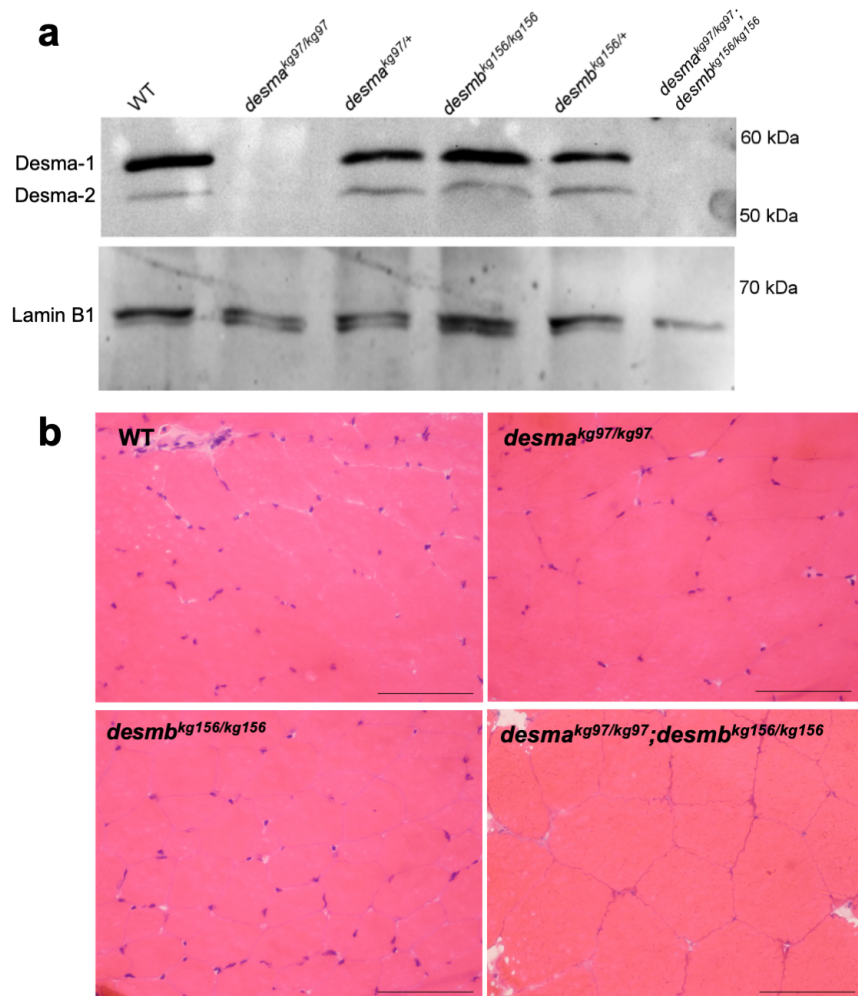



**Figure 5.**

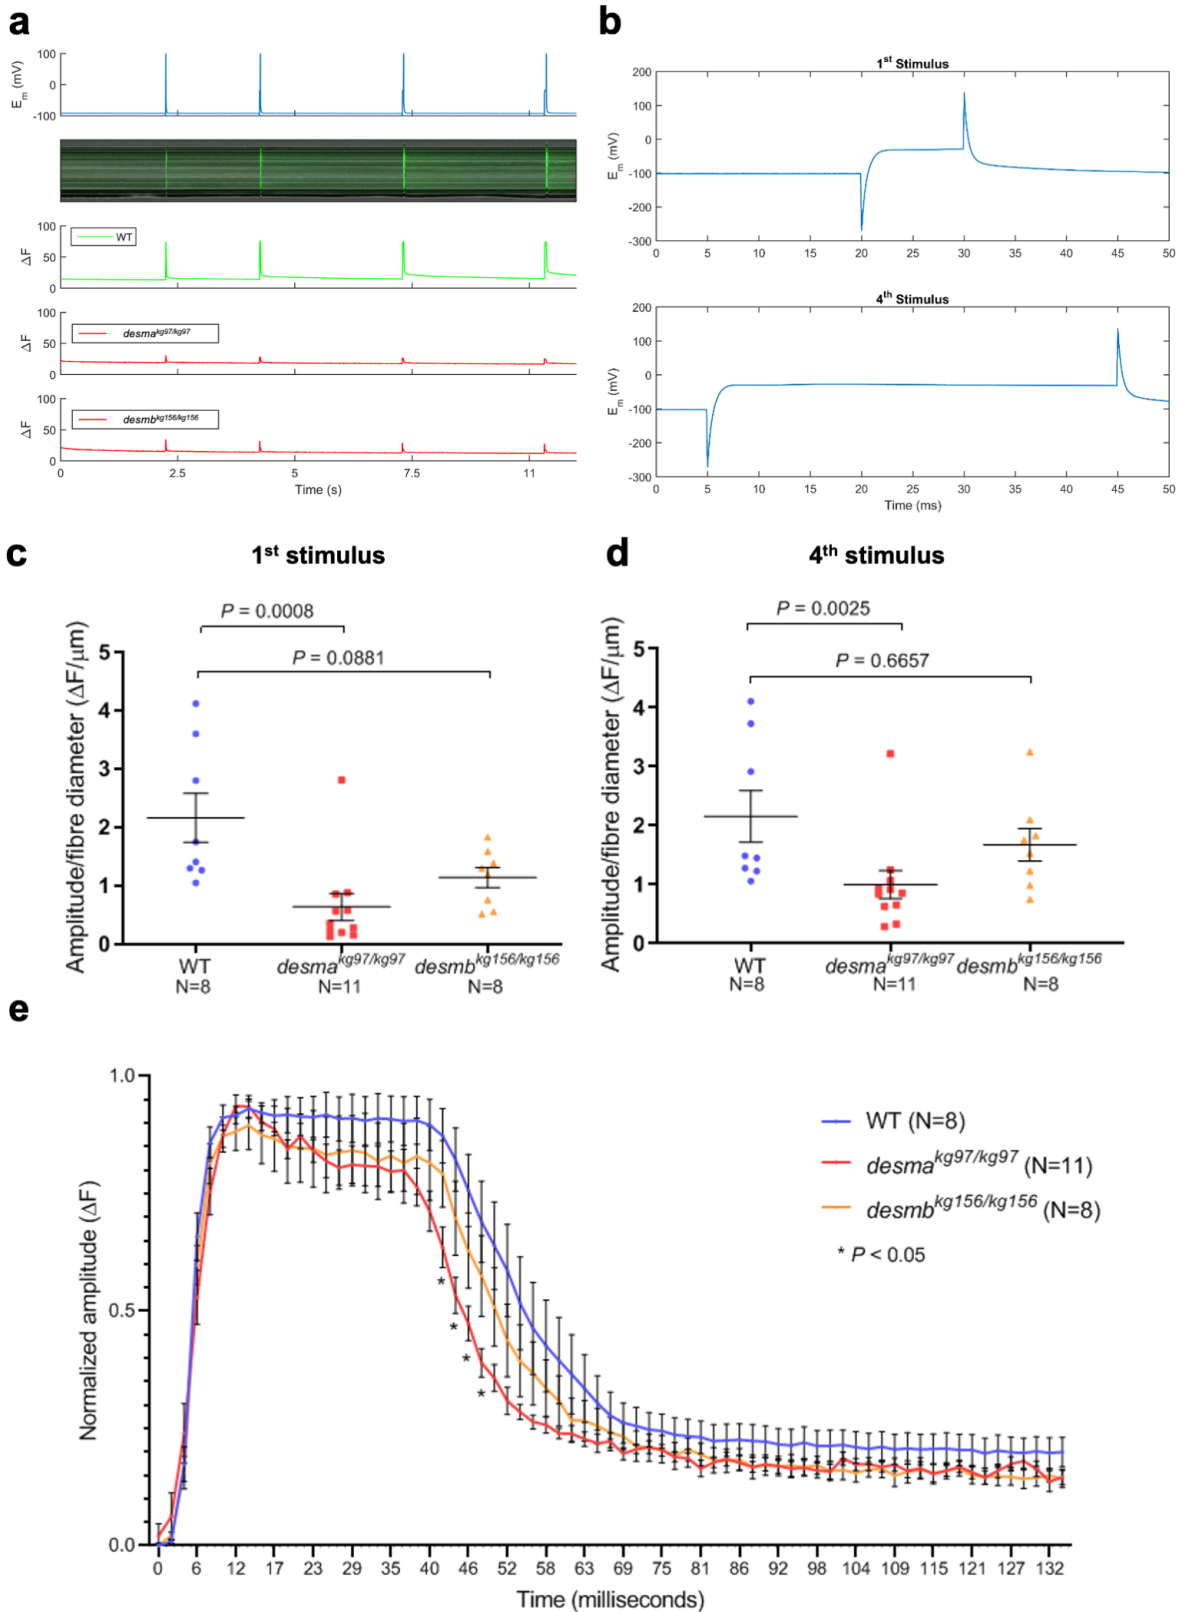

Source: https://www.biorxiv.org/content/10.1101/2020.10.16.342485v1.full.pdf
